# Supplementary material for: Differences in carotid to femoral pulse wave velocity and carotid intima media thickness between vegetarian and omnivorous diets in healthy subjects: a systematic review and meta-analysis
Source: Royal Society of Chemistry journal article supplement (doi:10.1039/d3fo05061k), 2024-01-01

## Differences in arterial stiffness and atherosclerosis between vegetarian and omnivorous diets. A systematic review and meta-analysis.

**ESI Table 1.** Search strategy for the MEDLINE database.

|                                                                           |            |                                               |            |                                               |            |                                                                                                                                                                                   |
|---------------------------------------------------------------------------|------------|-----------------------------------------------|------------|-----------------------------------------------|------------|-----------------------------------------------------------------------------------------------------------------------------------------------------------------------------------|
| Adults<br><b>OR</b><br>Adult<br>population<br><b>OR</b><br>Adult subjects | <b>AND</b> | Vegetarian<br><b>OR</b><br>Vegetarian<br>diet | <b>AND</b> | Omnivorous<br><b>OR</b><br>Omnivorous<br>diet | <b>AND</b> | Arterial stiffness<br><b>OR</b><br>PW <sub>v</sub><br><b>OR</b><br>Pulse wave velocity<br><b>OR</b><br>Atherosclerosis<br><b>OR</b><br>IMT<br><b>OR</b><br>Intima media thickness |
|---------------------------------------------------------------------------|------------|-----------------------------------------------|------------|-----------------------------------------------|------------|-----------------------------------------------------------------------------------------------------------------------------------------------------------------------------------|

**ESI Table 2.** Quality assessment with the tool for observational cohort and cross-sectional studies of the National Heart, Lung and Blood Institute for carotid to femoral pulse wave velocity.

| Reference                                | 1 | 2 | 3  | 4  | 5 | 6  | 7  | 8 | 9 | 10 | 11 | 12 | 13 | 14 | Quality |
|------------------------------------------|---|---|----|----|---|----|----|---|---|----|----|----|----|----|---------|
| Sanders, 2014 <sup>25</sup>              | N | N | NR | NR | N | NA | NA | N | N | N  | Y  | NA | NA | N  | LOW     |
| Acosta-Navarro et al, 2017 <sup>26</sup> | Y | Y | N  | Y  | N | NA | NA | N | N | N  | Y  | NA | NA | Y  | FAIR    |
| Cinegaglia et al, 2020 <sup>28</sup>     | Y | Y | N  | Y  | N | NA | NA | N | N | N  | Y  | NA | NA | Y  | FAIR    |
| Antoniazzi et al, 2022 <sup>30</sup>     | Y | Y | N  | Y  | N | NA | NA | N | Y | N  | Y  | NA | NA | N  | FAIR    |
| Mayra and Johnston, 2022 <sup>31</sup>   | Y | Y | NR | Y  | N | NA | NA | N | Y | N  | Y  | NA | NA | N  | FAIR    |
| Ramos González et al, 2022 <sup>32</sup> | Y | Y | NR | Y  | N | NA | NA | N | Y | N  | Y  | NA | NA | N  | FAIR    |

1. Was the research question or objective in this paper clearly stated?; 2. Was the study population clearly specified and defined?; 3. Was the participation rate of eligible persons at least 50%?; 4. Were all the subjects selected or recruited from the same or similar populations (including the same time period)? Were inclusion and exclusion criteria for being in the study prespecified and applied uniformly to all participants?; 5. Was a sample size justification, power description, or variance and effect estimates provided?; 6. For the analyses in this paper, were the exposure(s) of interest measured prior to the outcome(s) being measured?; 7. Was the timeframe sufficient so that one could reasonably expect to see an association between exposure and outcome if it existed?; 8. For exposures that can vary in amount or level, did the study examine different levels of the exposure as related to the outcome (e.g., categories of exposure, or exposure measured as continuous variable)?; 9. Were the exposure measures (independent variables) clearly defined, valid, reliable, and implemented consistently across all study participants?; 10. Was the exposure(s) assessed more than once over time?; 11. Were the outcome measures (dependent variables) clearly defined, valid, reliable, and implemented consistently across all study participants?; 12. Were the outcome assessors blinded to the exposure status of participants?; 13. Was loss to follow-up after baseline 20% or less?; 14. Were key potential confounding variables measured and adjusted statistically for their impact on the relationship between exposure(s) and outcome(s)?; N: no; NA: not applicable; NR: not reported; Y: yes.

**ESI Table 3.** Quality assessment with the tool for observational cohort and cross-sectional studies of the National Heart, Lung and Blood Institute for carotid intima media thickness.

| Reference                                | 1 | 2 | 3  | 4 | 5 | 6  | 7  | 8 | 9 | 10 | 11 | 12 | 13 | 14 | Quality |
|------------------------------------------|---|---|----|---|---|----|----|---|---|----|----|----|----|----|---------|
| Su et al, 2006 <sup>23</sup>             | N | Y | N  | Y | N | NA | NA | N | N | N  | Y  | NA | NA | Y  | FAIR    |
| Yang et al, 2012 <sup>24</sup>           | Y | Y | NR | Y | N | NA | NA | N | Y | N  | Y  | NA | NA | N  | FAIR    |
| Acosta-Navarro et al, 2017 <sup>26</sup> | Y | Y | N  | Y | N | NA | NA | N | N | N  | Y  | NA | NA | Y  | FAIR    |
| Cinegaglia et al, 2019 <sup>27</sup>     | Y | Y | N  | Y | N | NA | NA | N | N | N  | Y  | NA | NA | N  | FAIR    |
| Cinegaglia et al, 2020 <sup>28</sup>     | Y | Y | N  | Y | N | NA | NA | N | N | N  | Y  | NA | NA | Y  | FAIR    |
| Page et al, 2021 <sup>29</sup>           | Y | Y | NR | Y | N | NA | NA | N | Y | N  | Y  | NA | NA | N  | FAIR    |
| Antoniazzi et al, 2022 <sup>30</sup>     | Y | Y | N  | Y | N | NA | NA | N | Y | N  | Y  | NA | NA | N  | FAIR    |

1. Was the research question or objective in this paper clearly stated?; 2. Was the study population clearly specified and defined?; 3. Was the participation rate of eligible persons at least 50%?; 4. Were all the subjects selected or recruited from the same or similar populations (including the same time period)? Were inclusion and exclusion criteria for being in the study prespecified and applied uniformly to all participants?; 5. Was a sample size justification, power description, or variance and effect estimates provided?; 6. For the analyses in this paper, were the exposure(s) of interest measured prior to the outcome(s) being measured?; 7. Was the timeframe sufficient so that one could reasonably expect to see an association between exposure and outcome if it existed?; 8. For exposures that can vary in amount or level, did the study examine different levels of the exposure as related to the outcome (e.g., categories of exposure, or exposure measured as continuous variable)?; 9. Were the exposure measures (independent variables) clearly defined, valid, reliable, and implemented consistently across all study participants?; 10. Was the exposure(s) assessed more than once over time?; 11. Were the outcome measures (dependent variables) clearly defined, valid, reliable, and implemented consistently across all study participants?; 12. Were the outcome assessors blinded to the exposure status of participants?; 13. Was loss to follow-up after baseline 20% or less?; 14. Were key potential confounding variables measured and adjusted statistically for their impact on the relationship between exposure(s) and outcome(s)?; N: no; NA: not applicable; NR: not reported; Y: yes.

**ESI Table 4.** Meta-regression according to mean age, percentage of female and body mass index for carotid to femoral pulse wave velocity (cf-PWv) and carotid intima media thickness (c-IMT).

|                                              | <b>Coefficient</b> | <b>95% CIs</b>    | <b>P value</b> |
|----------------------------------------------|--------------------|-------------------|----------------|
| <b>c-IMT</b>                                 |                    |                   |                |
| <i><b>Vegetarian diet</b></i>                |                    |                   |                |
| Mean age                                     | 6.615              | -8.844, 22.074    | 0.207          |
| Percentage of female                         | 2.785              | -4.815, 10.386    | 0.256          |
| Body mass index                              | -167.619           | -590.567, 255.329 | 0.230          |
| Total cholesterol                            | 6.047              | -106.371, 118.467 | 0.618          |
| Low density lipoprotein                      | 2.686              | -224.357, 229.729 | 0.905          |
| High density lipoprotein                     | 15.300             | -182.389, 212.989 | 0.505          |
| Triglycerides                                | -1.129             | -30.972, 28.713   | 0.715          |
| <i><b>Omnivorous diet</b></i>                |                    |                   |                |
| Mean age                                     | 6.773              | -10.182, 23.728   | 0.228          |
| Percentage of female                         | 2.023              | -5.155, 9.202     | 0.349          |
| Body mass index                              | 18.416             | -195.217, 232.049 | 0.1746         |
| Total cholesterol                            | 8.007              | -118.386, 134.401 | 0.569          |
| Low density lipoprotein                      | 5.898              | -234.924, 246.721 | 0.808          |
| High density lipoprotein                     | 6.908              | -110.537, 124.352 | 0.591          |
| Triglycerides                                | -0.086             | -21.972, 21.798   | 0.968          |
| <i><b>Vegetarian vs Omnivorous diets</b></i> |                    |                   |                |
| Mean age                                     | -0.448             | -6.141, 7.037     | 0.798          |
| Percentage of female                         | 0.549              | -0.960, 2.059     | 0.258          |
| Body mass index                              | -32-607            | -99.538, 34.324   | 0.171          |
| Total cholesterol                            | 1.962              | -40.142, 44.067   | 0.660          |
| Low density lipoprotein                      | -2.162             | -108.644, 104.320 | 0.839          |
| High density lipoprotein                     | 3.899              | -27.771, 35.570   | 0.362          |
| Triglycerides                                | -0.703             | -7.928, 6.521     | 0.433          |
| <b>cf-PWv</b>                                |                    |                   |                |
| <i><b>Vegetarian diet</b></i>                |                    |                   |                |
| Mean age                                     | 0.102              | -0.132, 0.336     | 0.202          |
| Percentage of female                         | -0.019             | -0.069, 0.031     | 0.242          |
| Body mass index                              | 1.207              | -2.221, 4.634     | 0.269          |
| Total cholesterol                            | 0.106              | -0.710, 0.921     | 0.347          |
| Low density lipoprotein                      | 0.079              | -0.525, 0.684     | 0.345          |
| High density lipoprotein                     | -0.155             | -1.507, 1.197     | 0.3383         |
| Triglycerides                                | 0.076              | -0.565, 0.718     | 0.372          |
| <i><b>Omnivores diet</b></i>                 |                    |                   |                |
| Mean age                                     | 0.114              | -0.121, 0.348     | 0.172          |
| Percentage of female                         | -0.029             | -0.071, 0.013     | 0.130          |
| Body mass index                              | 0.575              | -0.692, 1.843     | 0.190          |
| Total cholesterol                            | 0.064              | -0.409, 0.536     | 0.336          |
| Low density lipoprotein                      | 0.063              | -0.391, 0.517     | 0.329          |
| High density lipoprotein                     | -0.099             | -1.125, 0.926     | 0.435          |
| Triglycerides                                | 0.029              | -0.199, 0.259     | 0.351          |
| <i><b>Vegetarian vs Omnivorous diets</b></i> |                    |                   |                |
| Mean age                                     | -0.012             | -0.064, 0.041     | 0.447          |
| Percentage of female                         | 0.003              | -0.010, 0.017     | 0.420          |
| Body mass index                              | -0.097             | -0.519, 0.325     | 0.426          |
| Total cholesterol                            | -0.010             | -0.158, 0.138     | 0.549          |
| Low density lipoprotein                      | -0.010             | -0.135, 0.116     | 0.510          |
| High density lipoprotein                     | 0.026              | -0.239, 0.291     | 0.433          |
| Triglycerides                                | -0.007             | -0.086, 0.071     | 0.442          |

**ESI Figure 1.** Comparisons of mean carotid to femoral pulse wave velocity (cf-PWV) between vegetarian and omnivorous diets.

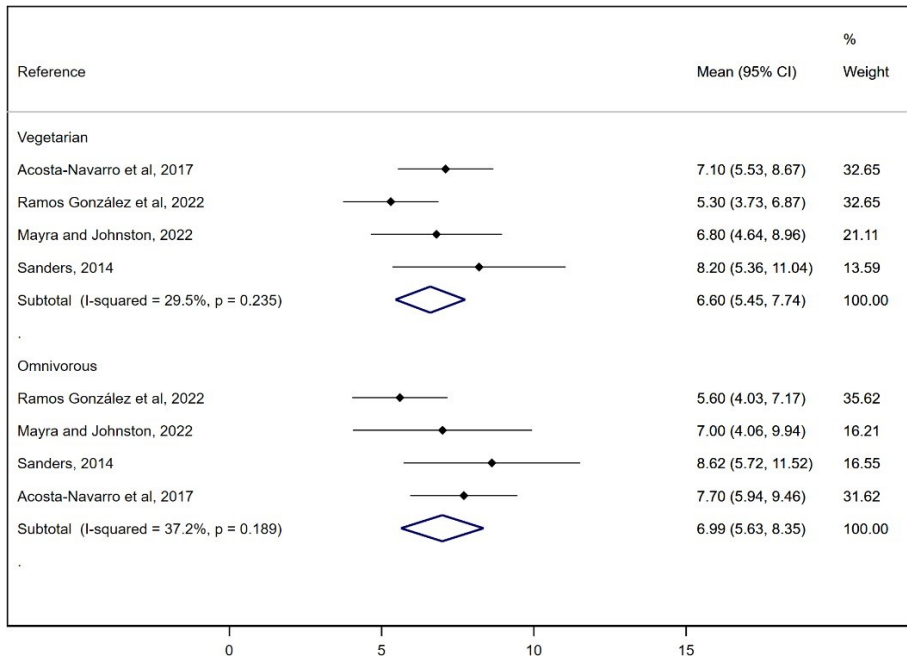

**ESI Figure 2.** Comparisons of mean carotid intima media thickness (c-IMT) between vegetarian and omnivorous diets.

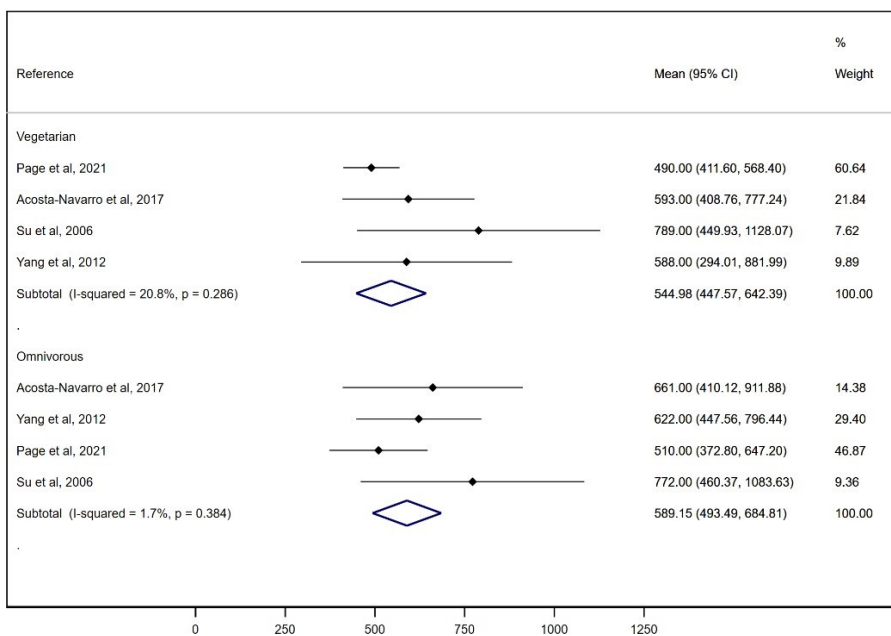

Supplement: d3fo05061k4.pdf [file d3fo05061k4.pdf]
