# Supplementary material for: Differences in carotid to femoral pulse wave velocity and carotid intima media thickness between vegetarian and omnivorous diets in healthy subjects: a systematic review and meta-analysis
Source: Royal Society of Chemistry journal article supplement (doi:10.1039/d3fo05061k), 2024-01-01
Supplement: d3fo05061k3.xlsx [file d3fo05061k3.xlsx]

## Sheet: Hoja1
Reference	Vegetarians	SD-V	n-V	Age-V	Gender-V	BMI-V	Colest-V	LDL-V	HDL-V	Trig-V	Omnivores	SD-O	n-O	Age-O	Gender-O	BMI-O	Colest-O	LDL-O	HDL-O	Trig-O	MD	LL	UL	t	Age-MD	Gender-MD	BMI-MD	Colest-MD	LDL-MD	HDL-MD	Trig-MD
Acosta-Navarro et al, 2017	7.1	0.8	44	45.5	0	23.1	180.1	110	47.6	112.2	7.7	0.9	44	46.8	0	27.2	202.7	128.5	45.5	143.9	-0.6	-0.96	-0.24	cf-PWV	46.15	0	25.15	191.4	119.3	46.6	128.1
Acosta-Navarro et al, 2017	593	94	44				180.1	110	47.6	112.2	661	128	44				202.7	128.5	45.5	143.9	-68	-114.92	-21.08	c-IMT				191.4	119.3	46.6	128.1
Ramos González et al, 2022	5.3	0.8	30	26	83.3	22.3	164	87	58	90	5.6	0.8	28	26	53.6	23.3	173	96	60	79	-0.3	-0.71	0.11	cf-PWV	26	68.45	22.8	168.5	91.5	59	84.5
Sanders, 2014	8.2	1.45	159		0	23.9					8.62	1.48	165		0	26.3					-0.42	-0.74	-0.1	cf-PWV		0	25.1
Mayra and Johnston, 2022	6.8	1.1	20	34.2	80	22	179.9	105.1	55.2	97.9	7	1.5	22	37.4	77.3	24.2	203.4	122.2	63.8	86.7	-0.2	-0.99	0.59	cf-PWV	35.8	78.65	23.1	191.7	113.7	59.5	92.3
Page et al, 2021	490	40	9	24	0	24					510	70	16	21	0	24					-20	-63.12	23.12	c-IMT	22.5	0	24
Su et al, 2006	789	173	57	59.2	100	23	189.5	108.3	58	54.1	772	159	61	57.5	100	23.5	212.7	123.7	65.7	50.3	17	-43.08	77.08	c-IMT	58.35	100	23.25	201.1	116	61.9	52.2
Yang et al, 2012	588	150	117	32.56	0	23.6	164.7	99.8	43.7	46.4	622	89	126	34.22	0	24.42	194.9	120.3	47.6	59.5	-34	-65.31	-2.69	c-IMT	33.39	0	24.01	179.8	110.1	45.7	53
