# Supplementary figures and images for: Differences in carotid to femoral pulse wave velocity and carotid intima media thickness between vegetarian and omnivorous diets in healthy subjects: a systematic review and meta-analysis
Source: Royal Society of Chemistry journal article supplement (doi:10.1039/d3fo05061k), 2024-01-01

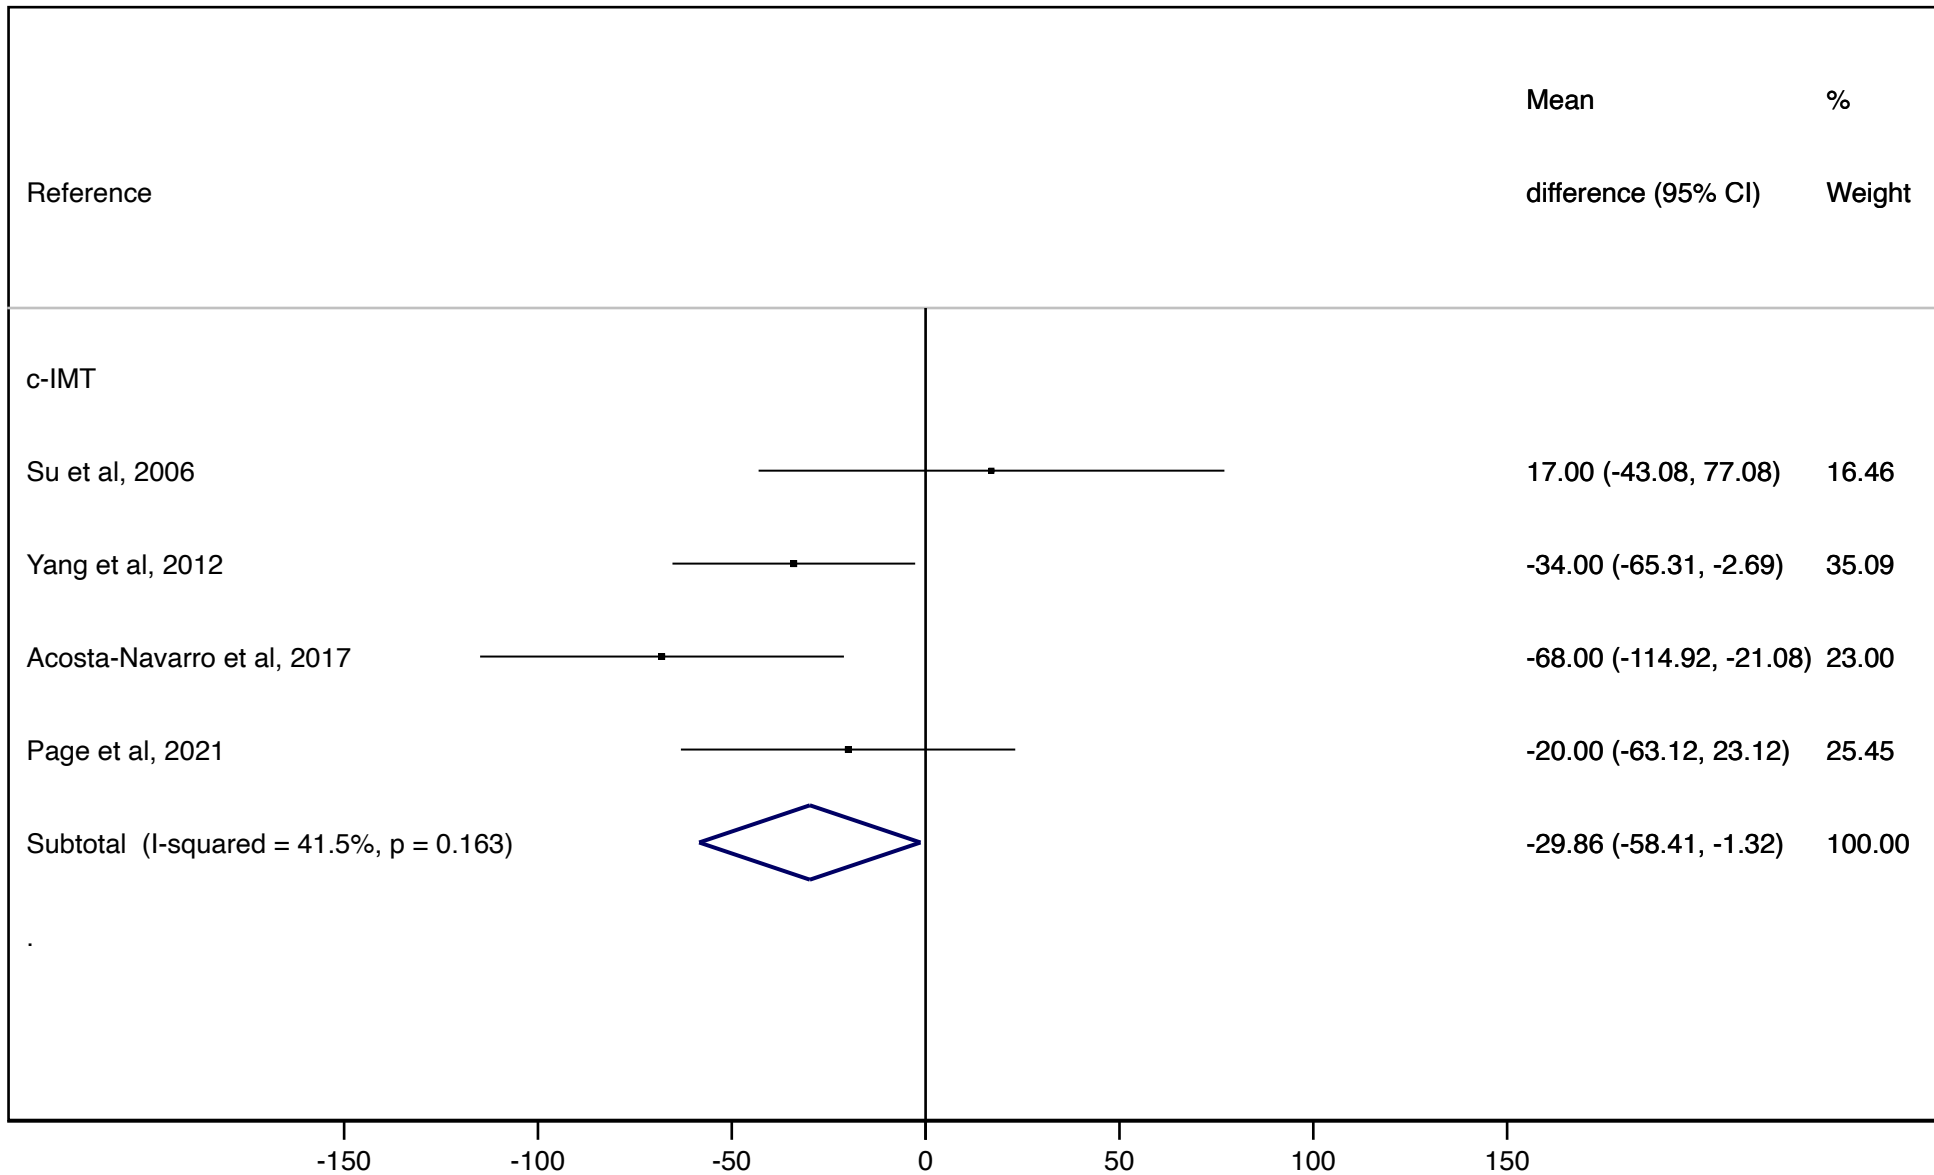

Supplement: d3fo05061k1.pdf [file d3fo05061k1.pdf]

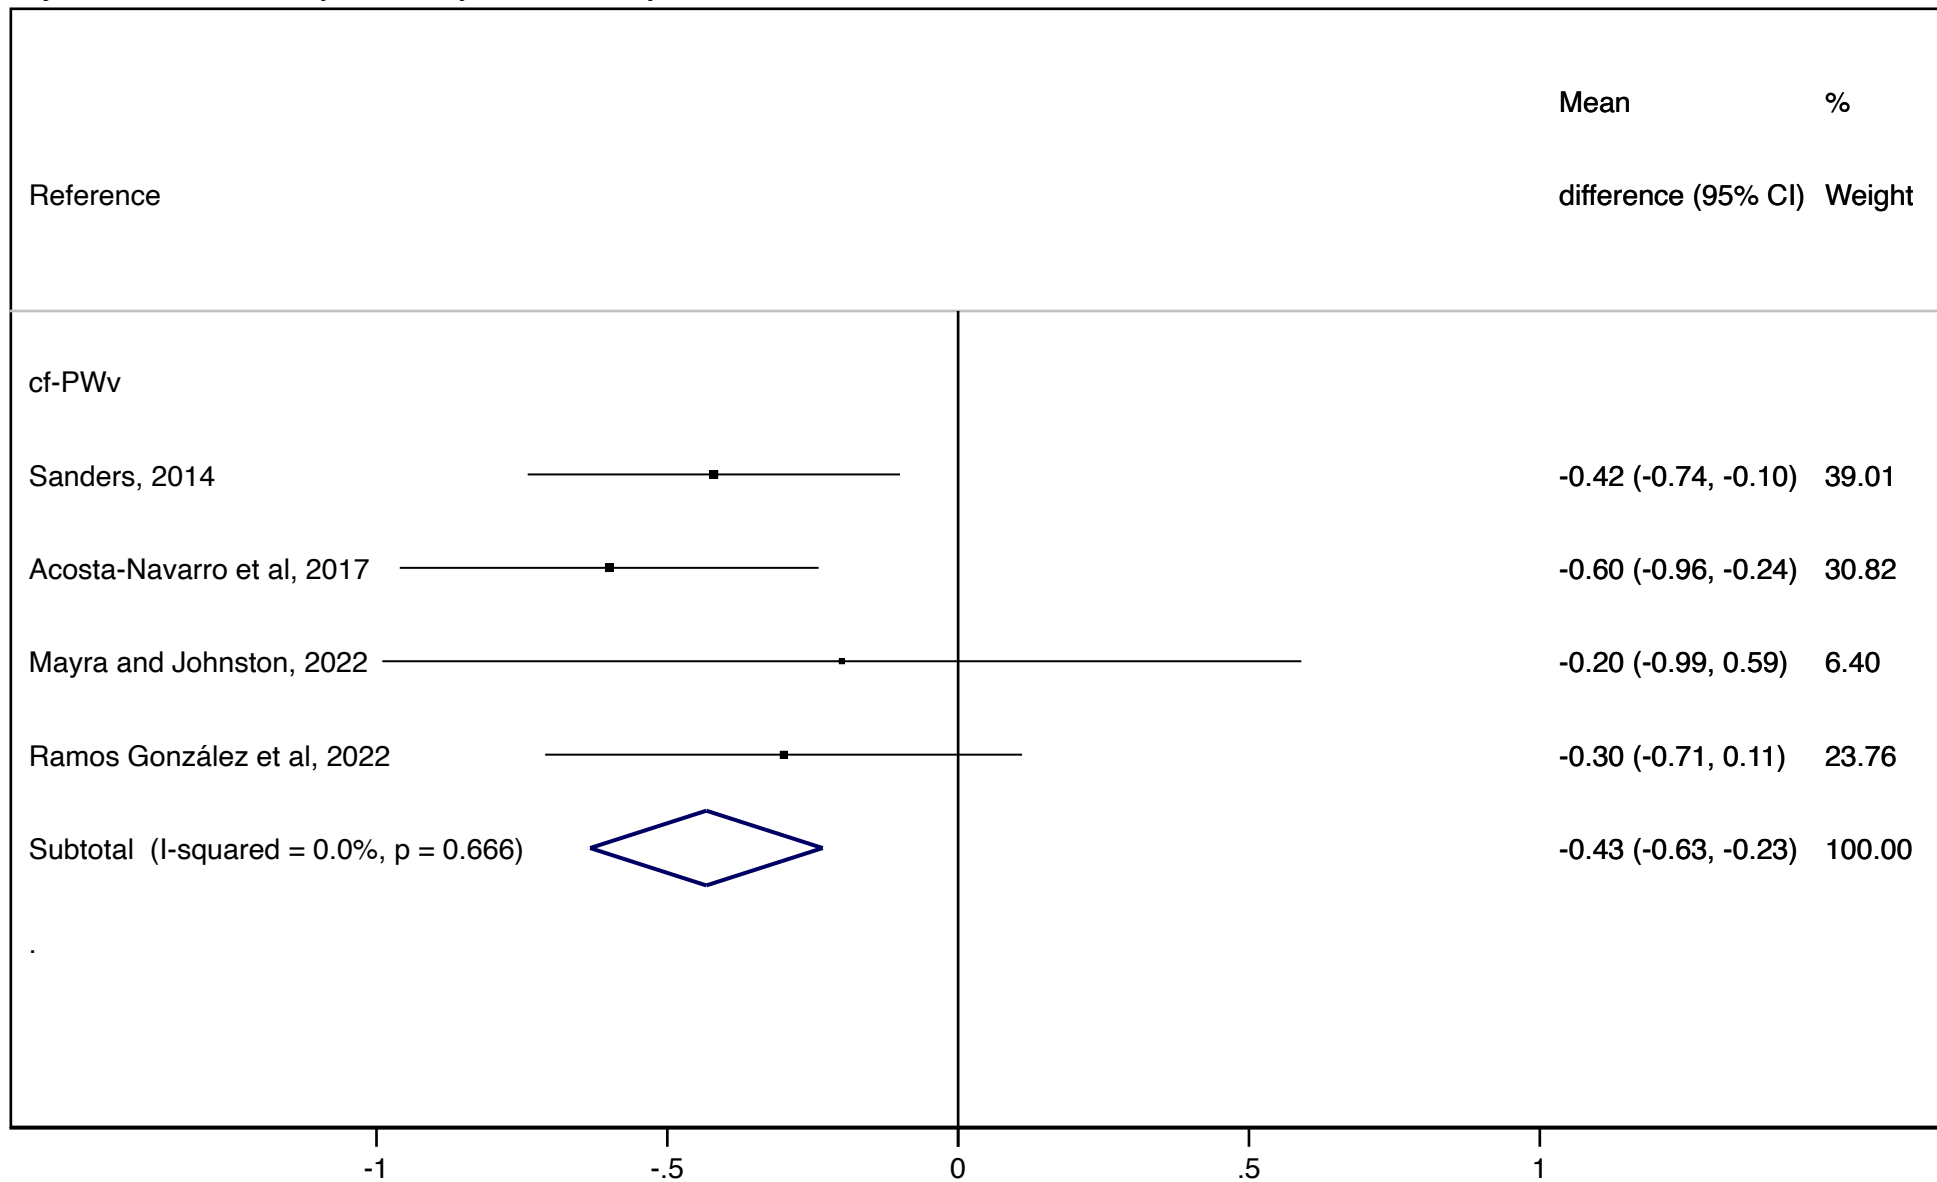

Supplement: d3fo05061k2.pdf [file d3fo05061k2.pdf]
